# Supplementary material for: Novel genetic tools that enable highly pure protein production in Trichoderma reesei
Source: PubMed Central journal article supplement (PMC6430808; doi:10.1038/s41598-019-41573-8), 2019-03-22
Supplement: 41598_2019_41573_MOESM1_ESM.pdf [file 41598_2019_41573_MOESM1_ESM.pdf]

# **Novel genetic tools that enable highly pure protein production in *Trichoderma reesei***

Anssi Rantasalo, Marika Vitikainen, Toni Paasikallio, Jussi Jäntti, Christopher P. Landowski, and Dominik Mojzita\*

VTT Technical Research Centre of Finland, P.O. Box 1000, FI-02044 VTT, Espoo, Finland

\*Corresponding author: Tel: +358 40 3591913; Email: [dominik.mojzita@vtt.fi](mailto:dominik.mojzita@vtt.fi)

## **Supplementary figures**

**Supplementary figure 1:** Screen for efficient secretion signal sequences - SDS-PAGE analysis

**Supplementary figure 2:** Screen for efficient secretion signal sequences - calB enzymatic activity

**Supplementary figure 3:** Construction and analysis of additional AaSS-calB strains

**Supplementary figure 4:** Transcription levels of selected genes encoding proteins involved in secretion

**Supplementary figure 5:** Original scans of the SDS-PAGE gels shown in Figures 2C and 3B

## **Supplementary tables**

**Supplementary table 1:** Secretion signal sequences tested in this study

**Supplementary table 2:** Primers used for construction of cellulose-loci targeted cassettes (SES constructs)

**Supplementary table 3:** Primers used for the gene copy number and deletion analyses

**Supplementary table 4:** Primers used for the transcription analysis

**Supplementary table 5:** The specific activities of calB produced by the SES strains in bioreactors

## Supplementary Figure 1

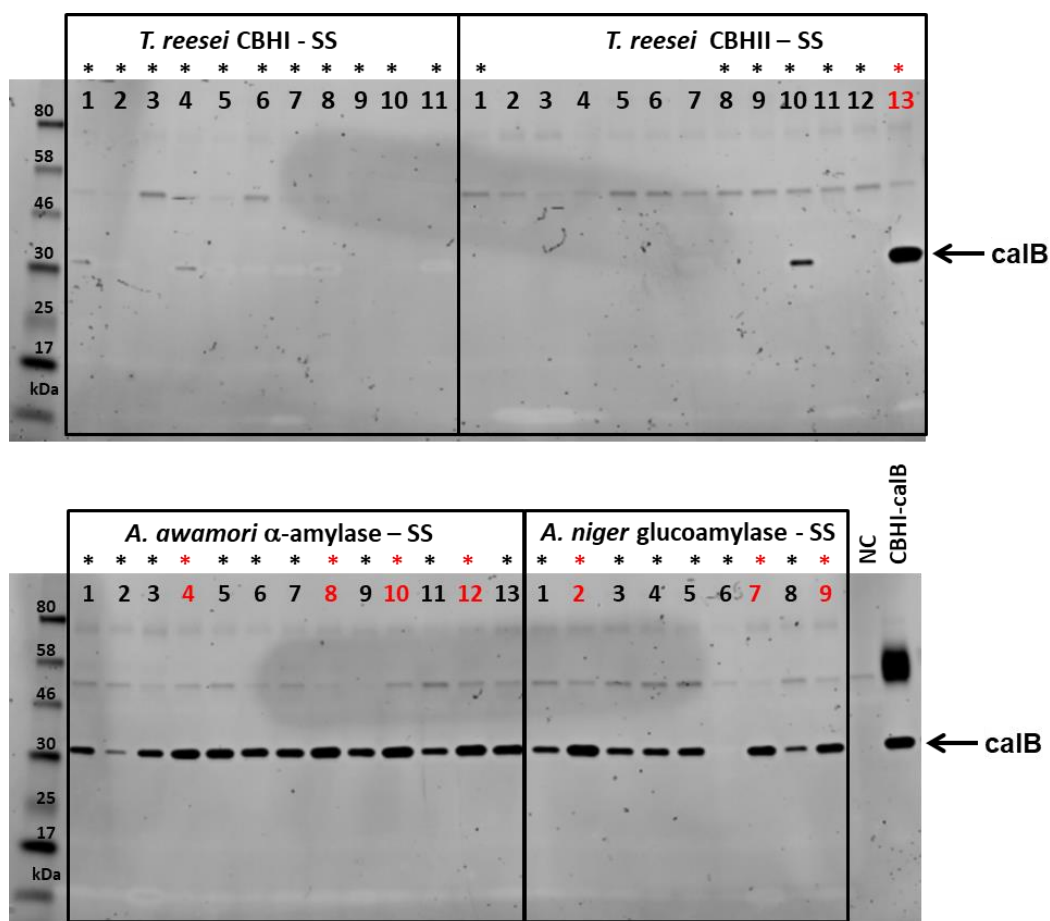

### Supplementary figure 1: Screen for efficient secretion signal sequences - SDS-PAGE analysis

The secretion signal sequences (SS) of CBHI (*T. reesei*), CBHII (*T. reesei*),  $\alpha$ -amylase (*A. awamori*) and glucoamylase (*A. niger*) (see **Supplementary table 2**) were fused to the calB encoding sequence to form the N-terminus of resulting proteins. The sTF and SS-calB expression cassettes were integrated into *T. reesei* genome by two steps of CRISPR/Cas9 mediated transformations. In the first step, the sTF expression cassette was targeted into the *egl1* locus. And in the second step, the resulting strain was transformed by multiplexed CRISPR/Cas9 targeting the SS-calB cassettes simultaneously into the *cbh1*, *cbh2*, and *egl2* loci (as described in the main text and shown in **Figure 3A**). Several colonies (9-13) were randomly selected from each transformation plate and the strains cultivated in 4 mL of glucose-containing medium in 24-well plate for 3 days. The total protein produced (secreted) was analyzed by the SDS-PAGE (Coomassie staining) to test the efficiency of each signal sequence for the calB protein secretion. The culture media samples were diluted 1:10 in water and 12  $\mu$ L were loaded into the gel. The previously tested CBHI-calB strain (SES strain, Figure 2A) and its parental strain, lacking the sTF and the CBHI-calB expression cassettes, were included in the parallel cultivations as positive and negative control (NC), respectively. The culture supernatant samples collected from clones marked with asterisk (\*) were further analyzed by performing the lipase assay. The clones highlighted in red were also subjected to gene copy number analysis (data not shown), from which the only correct clone was found to be clone #4 of the calB-producer with  $\alpha$ -amylase-SS, containing three copies of the SS-calB cassettes and all three corresponding cellulase genes deletions.

## Supplementary Figure 2

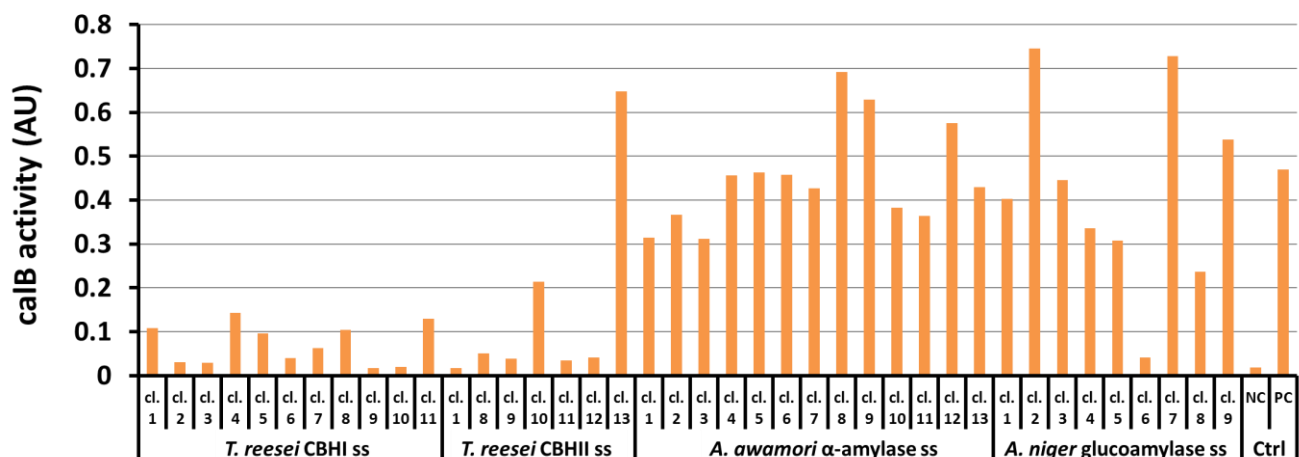

### Supplementary figure 2: Screen for efficient secretion signal sequences - calB enzymatic activity

The selected samples described in Supplementary figure 1 were analyzed for the calB-lipase activity. The lipase activity levels shown here represent raw measurement values from a single technical replicate (no normalization to protein concentration). The culture supernatants from the CBHI-calB strain (SES strain, **Figure 2A**) and its parental strain, lacking the sTF and the CBHI-calB expression cassettes, were included in the calB activity measurements as positive (PC) and negative controls (NC), respectively.

## Supplementary Figure 3

**A**

|                           | Triple deletion           | Double deletion |               |               | Single deletion |               |               | No deletions | Total    |
|---------------------------|---------------------------|-----------------|---------------|---------------|-----------------|---------------|---------------|--------------|----------|
|                           | $\Delta cbh1$             | $\Delta cbh1$   | $\Delta chb1$ | $\Delta cbh2$ | $\Delta cbh1$   | $\Delta cbh2$ | $\Delta egl2$ |              |          |
|                           | $\Delta cbh2 \Delta egl2$ | $\Delta cbh2$   | $\Delta egl2$ | $\Delta egl2$ |                 |               |               |              |          |
| Number of clones          | 9 (15%)                   | 1 (2%)          | 0 (0%)        | 32 (53%)      | 1 (2%)          | 5 (8%)        | 4 (7%)        | 8 (13%)      | 60       |
| Pure clones (% of total)  | 5 (56%)                   | 0 (0%)          | 0 (0%)        | 27 (84%)      | 0 (0%)          | 5 (100%)      | 3 (75%)       | -            | 40 (67%) |
| Mixed clones (% of total) | 4 (44%)                   | 1 (100%)        | 0 (0%)        | 5 (16%)       | 1 (100%)        | 0 (0%)        | 1 (25%)       | -            | 12 (20%) |

**B**

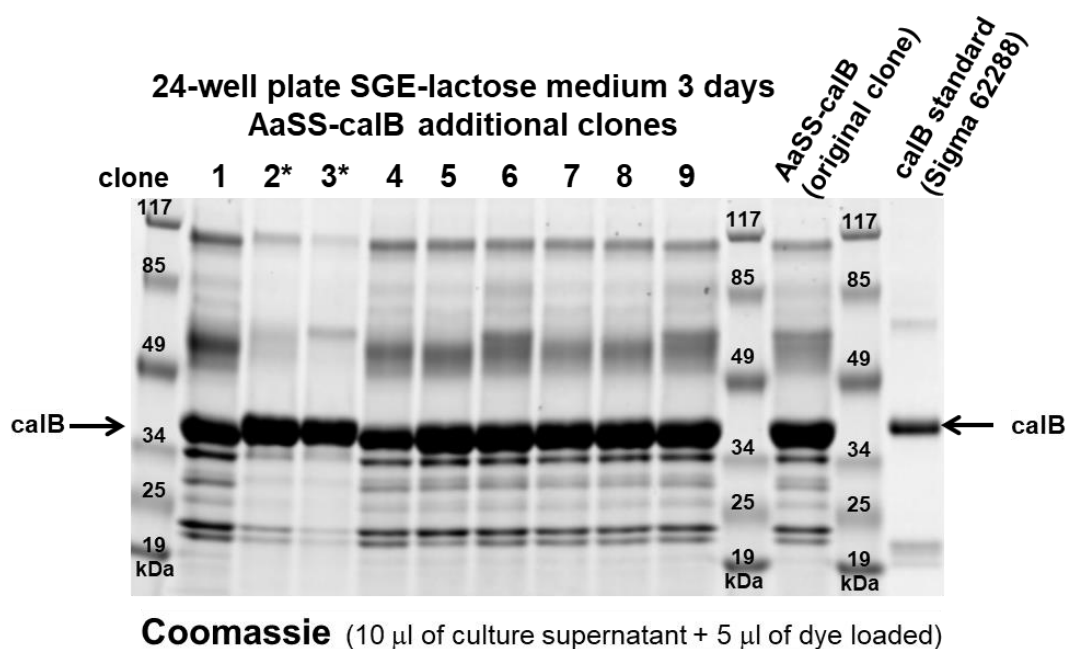

### Supplementary figure 3: Construction and analysis of additional AaSS-calB strains

The AaSS-calB strain was constructed again by multiplexed CRISPR/Cas9 targeting the AaSS-calB cassettes simultaneously into the *cbh1*, *cbh2*, and *egl2* loci (as described in the main text and shown in Figure 3A). **A**) Sixty colonies were randomly selected from the transformation plate and analyzed for correct replacements of the targeted loci by the AaSS-calB cassette. Nine out of 60 colonies contained all three target genes deleted; 5 pure clones were obtained directly, and additional 4 clones were obtained by purification of mixed colonies by plating diluted conidia and re-analyzing the resulting colonies. **B**) The additional AaSS-calB colonies were cultivated next to the originally isolated AaSS-calB strain in 4 mL of SG-lactose medium in 24-well plate for 3 days. The SDS-PAGE analysis of the cultures supernatants revealed highly similar amounts of calB produced in the tested strains. The clones 2 and 3 (marked with asterisk) contained more than three copies of the AaSS-calB cassette integrated in the genome as determined by qPCR.

## Supplementary Figure 4

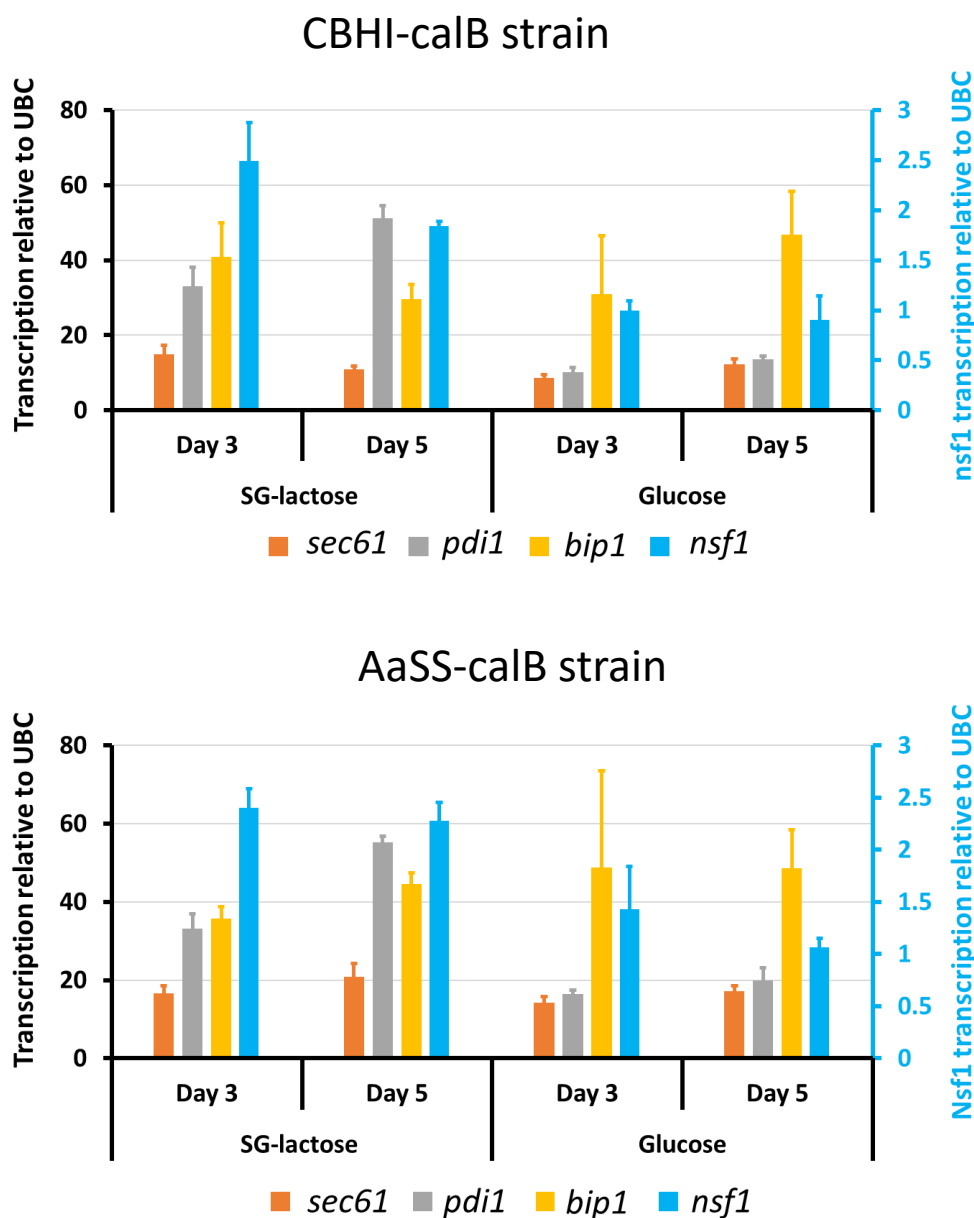

### Supplementary figure 4: Transcription levels of selected genes encoding proteins involved in secretion

The effect of cultivation conditions on transcriptional regulation of selected genes involved in protein secretion was studied. The analysis was performed on CBHI-calB (**Figure 2A**) and AaSS-calB (**Figure 3A**) strains grown in bioreactors in cellulase inducing SG-lactose and cellulase repressing glucose media. The analysis was performed on samples collected on the days 3 and 5. Transcription levels of selected genes were normalized to the transcript levels of endogenous *ubc* gene. Transcript levels of the *nsf1* are shown on the secondary y-axis (blue axis on the right). Values and error bars represent the mean and standard deviation from two biological (four technical) replicates.

## Supplementary Figure 5

**A**

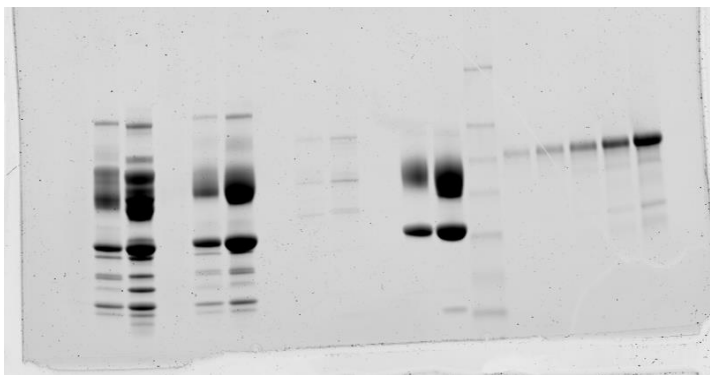

**B**

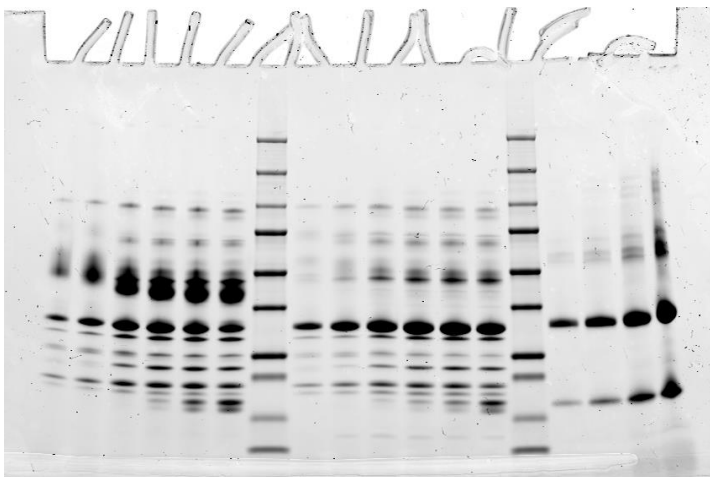

**C**

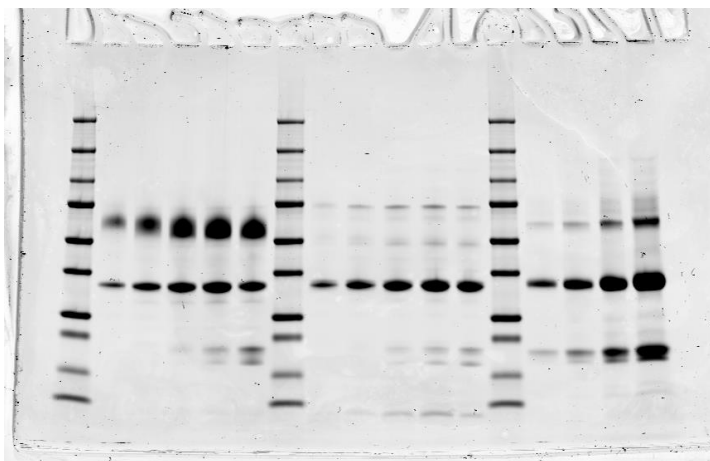

### Supplementary figure 5: Original scans of the SDS-PAGE gels shown in Figures 2C and 3B.

The un-processed images of Coomassie-stained gels as acquired by the Odyssey CLx Imaging System instrument (LI-COR Biosciences). **A)** The original gel scan shown here was rotated, cropped, and the values of molecular weight standards were added before the use in **Figure 2C**. **B)** The original gel scan shown here was rotated, cropped, and the values of molecular weight standards were added before the use in **Figure 3B** (left). **C)** The original gel scan shown here was cropped, and the values of molecular weight standards were added before the use in **Figure 3B** (right).

## Supplementary Table 1

| Source gene       | Organism                   | Amino acid sequence        | Reference |
|-------------------|----------------------------|----------------------------|-----------|
| $\alpha$ -amylase | <i>Aspergillus awamori</i> | MRVSTSSLALSLSLFGKLALGLSAAE | 39        |
| Glucoamylase      | <i>Aspergillus niger</i>   | MSFRSLLALSGLVCTGLANV       | 39        |
| <i>cbh1</i>       | <i>Trichoderma reesei</i>  | MYRKLAVISAFLETARAQSA       | 38        |
| <i>cbh2</i>       | <i>Trichoderma reesei</i>  | MIVGILTTLATLATLAASVPL      | 39        |

**Supplementary Table 1:** Secretion signal sequences tested in this study. The first N-terminal 23 amino acids of the calB were replaced by the signal sequence. The references are numbered based on the main text.



## Supplementary Table 2

| Target           | Location relative to CDS                | Primer name | Sequence                                                       |
|------------------|-----------------------------------------|-------------|----------------------------------------------------------------|
| <i>cbh1</i> - 5' | 1581 to 2579 bp upstream of start codon | CBH1_5_GA_F | CTATAGGGAGACCACAACGGTTTCCCTGTTTAAACGC<br>TAGTTTGCCTCACACCAC    |
|                  |                                         | CBH1_5_GA_R | GAGCTGTACAGCTAGCGGCCGCAAATACACAGAA<br>GACACAACAAGTATCCAGTTCTTC |
| <i>cbh1</i> - 3' | 0 to 1000 bp downstream of stop codon   | CBH1_3_GA_F | TTGCGGCCGCTAGCTGTACAAGCTCCGTGGCGAAAG<br>CCTG                   |
|                  |                                         | CBH1_3_GA_R | CGGGCTTTGTTAGCAGCCGGATCAGTTTAAACGGAT<br>TTTGGAGGCAGCACATTC     |
| <i>cbh2</i> - 5' | 1554 to 2553 bp upstream of start codon | CBH2_5_GA_F | CTATAGGGAGACCACAACGGTTTCCCTGTTTAAACAT<br>ACTCCGGCCGGCTGTGCA    |
|                  |                                         | CBH2_5_GA_R | AGCCTGTACAGCTAGCGGCCGCTTAGGGCAATGACG<br>TAGTAGGTATATGC         |
| <i>cbh2</i> - 3' | 0 to 1000 bp downstream of stop codon   | CBH2_3_GA_F | AAGCGGCCGCTAGCTGTACAGGCTTCGTGACCGGG<br>CTTC                    |
|                  |                                         | CBH2_3_GA_R | CGGGCTTTGTTAGCAGCCGGATCAGTTTAAACGGTT<br>ATCCACGACAGCCATATTC    |
| <i>egl1</i> - 5' | 811 to 1811 bp upstream of start codon  | EGL1_5_GA_F | CTATAGGGAGACCACAACGGTTTCCCTGTTTAAACGT<br>ATCCCAGCTTGCGCATCC    |
|                  |                                         | EGL1_5_GA_R | GCTTGTACAGCTAGCGGCCGCTTCGAAGTCGATCAG<br>ACTGTTTG               |
| <i>egl1</i> - 3' | 2 to 1001 bp downstream of stop codon   | EGL1_3_GA_F | CGAAGCGGCCGCTAGCTGTACAAGCGTTGACTTGCC<br>TCTGGTC                |
|                  |                                         | EGL1_3_GA_R | CGGGCTTTGTTAGCAGCCGGATCAGTTTAAACGTTCA<br>AGGGCCTCCTCTACT       |
| <i>egl2</i> - 5' | 1248 to 2247 bp upstream of start codon | EGL2_5_GA_F | CTATAGGGAGACCACAACGGTTTCCCTGTTTAAACTT<br>GGTAAGTCTTTCTCCGCTTGC |
|                  |                                         | EGL2_5_GA_R | AGTGTGTACAGCTAGCGGCCGCTTGGTTTCGTGTGC<br>AAGGTTG                |
| <i>egl2</i> - 3' | 1 to 1000 bp downstream of stop codon   | EGL2_3_GA_F | AACCGGCCGCTAGCTGTACACACTCTGAGCTGAAT<br>GCAGAAG                 |
|                  |                                         | EGL2_3_GA_R | CGGGCTTTGTTAGCAGCCGGATCAGTTTAAACGGTT<br>CGACAAGTCCAAAGGTAG     |

**Supplementary Table 2:** Primers used for construction of cellulose-loci targeted cassettes (SES constructs). The PCR products obtained from the *T. reesei* genomic DNA were used as DNA regions flanking the SES-expression cassettes in the donor DNA molecules used for genomic integrations/ replacements of the selected genes. The *T. reesei* genome database ID numbers for the selected loci are listed in Supplementary Table 3.

### Supplementary Table 3

| Target               | JGI database ID * | Primer name      | Sequence                |
|----------------------|-------------------|------------------|-------------------------|
| <i>act1</i>          | 44504             | act1_qPCR_gDNA_F | GCCTTCTATGTCTCCATCCAG   |
|                      |                   | act1_qPCR_gDNA_R | CTCAGCCAGGATCTTCATCAG   |
| Bm3R1                |                   | BM3R1_qPRC_F     | GTCACATTCACAAAGAACCATCC |
|                      |                   | BM3R1_qPRC_R     | GACCTCCATAAACGATCCGA    |
| <i>calB</i>          |                   | calB_qPCR_F      | ACGTTCTTTCCAGCATCC      |
|                      |                   | calB_qPCR_R      | GCTGTAGAGGTTGGTGGTG     |
| <i>xyn1</i>          | 74223             | g-xyn1_qPCR_F    | CTGCTTCCGCTCTATGGCTG    |
|                      |                   | g-xyn1_qPCR_R    | GTAAGGTTGAAGGTCGCTG     |
| <i>cbh1</i>          | 123989            | g-cbh1_qPCR_F    | ACCACCAAGAAATTGACCGT    |
|                      |                   | g-cbh1_qPCR_R    | CGCCCTTGCTGAGAAAGAG     |
| <i>cbh1</i> promoter |                   | cbh1pr_qPCR_F    | GTTTGTCTTCTCACTCAGTCCA  |
|                      |                   | cbh1pr_qPCR_R    | CGATACACTCAAGCATCCCT    |
| <i>cbh2</i>          | 72567             | g-cbh2_qPCR_F    | CATCAACTACGCCGTCAC      |
|                      |                   | g-cbh2_qPCR_R    | GCTGGTAATGTTCCACCC      |
| <i>egl1</i>          | 122081            | g-egl1_qPCR_F    | ACCTTCACCATCATCACCC     |
|                      |                   | g-egl1_qPCR_R    | TCCAAATGCTGAACACGAG     |
| <i>egl2</i>          | 120312            | g-egl2_qPCR_F    | CTTGATTCCACGAGCATTTCC   |
|                      |                   | g-egl2_qPCR_R    | CATGATGCCGAACCACAC      |

**Supplementary Table 3:** Primers used for the gene copy number and deletion analyses by RT-PCR. \* - corresponding protein ID in the Joint Genome Institute's database (<http://genome.jgi.doe.gov/programs/fungi/index.jsf>).

### Supplementary Table 4

| Target       | JGI database ID* | Primer name  | Sequence                |
|--------------|------------------|--------------|-------------------------|
| <i>ubc</i>   | 77732            | UBC6_qPCR_F  | CCAACATCCTCGAATGGCAC    |
|              |                  | UBC6_qPCR_R  | GCTGGGTTGAAGGATTTCCGG   |
| Bm3R1        |                  | BM3R1_qPRC_F | GTCACATTCACAAAGAACCATCC |
|              |                  | BM3R1_qPRC_R | GACCTCCATAAACGATCCGA    |
| <i>calB</i>  |                  | calB_qPCR_F  | ACGTTCTTTCCAGCATCC      |
|              |                  | calB_qPCR_R  | GCTGTAGAGGTTGGTGGTG     |
| <i>sec61</i> | 121397           | sec61_qPCR_F | GCTGTCACCATCATCTACGG    |
|              |                  | sec61_qPCR_R | GGCTAGAATTTCCATGCAAGTC  |
| <i>pdi1</i>  | 122415           | pdi1_qPCR_F  | CAAGGAGATCACCGAGAAGGA   |
|              |                  | pdi1_qPCR_R  | AGCGTAGAACTCAATCAGGAC   |
| <i>bip1</i>  | 122920           | bip1_qPCR_F  | CCATCACCATCACCAACGAC    |
|              |                  | bip1_qPCR_R  | GTCAAGAATAGTCTCCTTGTCT  |
| <i>nsf1</i>  | 62040            | nsf1_qPCR_F  | GGAGATGATGCGTGTGTGG     |
|              |                  | nsf1_qPCR_R  | GTAGTCCTTCTGGCGAACTC    |

**Supplementary Table 4:** Primers used for the transcription analysis performed by RT-PCR. \* - corresponding protein ID in the Joint Genome Institute's database (<http://genome.jgi.doe.gov/programs/fungi/index.jsf>).

**Supplementary Table 5**

|                             |           |                   | U/L               | U/g              |
|-----------------------------|-----------|-------------------|-------------------|------------------|
| SG+lactose                  | CBHI-calB | Day 1             | <b>44 ± 3</b>     | <b>69 ± 4</b>    |
|                             |           | Day 2             | <b>55 ± 3</b>     | <b>82 ± 4</b>    |
|                             |           | Day 3             | <b>912 ± 38</b>   | <b>218 ± 9</b>   |
|                             |           | Day 4             | <b>2753 ± 78</b>  | <b>341 ± 10</b>  |
|                             |           | Day 5             | <b>5278 ± 75</b>  | <b>303 ± 4</b>   |
|                             |           | Day 6             | <b>6076 ± 109</b> | <b>284 ± 5</b>   |
|                             |           | Day 7             | <b>6457 ± 202</b> | <b>302 ± 9</b>   |
|                             |           | Day 7*            | <b>6560 ± 209</b> | <b>347 ± 11</b>  |
|                             | AaSS-calB | Day 1             | <b>46 ± 3</b>     | <b>80 ± 6</b>    |
|                             |           | Day 2             | <b>72 ± 1</b>     | <b>113 ± 1</b>   |
|                             |           | Day 3             | <b>2082 ± 113</b> | <b>497 ± 27</b>  |
|                             |           | Day 4             | <b>5006 ± 140</b> | <b>697 ± 19</b>  |
|                             |           | Day 5             | <b>7137 ± 28</b>  | <b>566 ± 2</b>   |
|                             |           | Day 6             | <b>8171 ± 83</b>  | <b>538 ± 5</b>   |
|                             |           | Day 7             | <b>8810 ± 221</b> | <b>505 ± 13</b>  |
| Day 7*                      |           | <b>8687 ± 231</b> | <b>578 ± 15</b>   |                  |
| Glucose                     | CBHI-calB | Day 2             | <b>626 ± 42</b>   | <b>289 ± 19</b>  |
|                             |           | Day 3             | <b>1998 ± 150</b> | <b>366 ± 27</b>  |
|                             |           | Day 4             | <b>3567 ± 110</b> | <b>477 ± 15</b>  |
|                             |           | Day 5             | <b>5312 ± 150</b> | <b>531 ± 15</b>  |
|                             |           | Day 5 *           | <b>5305 ± 172</b> | <b>574 ± 19</b>  |
|                             | AaSS-calB | Day 2             | <b>935 ± 71</b>   | <b>904 ± 69</b>  |
|                             |           | Day 3             | <b>2335 ± 131</b> | <b>817 ± 46</b>  |
|                             |           | Day 4             | <b>4184 ± 184</b> | <b>1132 ± 50</b> |
|                             |           | Day 5             | <b>5820 ± 177</b> | <b>1263 ± 38</b> |
|                             |           | Day 5*            | <b>5372 ± 173</b> | <b>1189 ± 38</b> |
| calB standard (Sigma 62288) |           |                   | n/a               | <b>793 ± 5</b>   |

**Supplementary Table 5:** The specific activities of calB produced by the SES strains in bioreactors. The CBHI-calB and the AaSS-calB strain were cultivated either in SG-lactose medium for 7 days or in glucose-containing medium for 5 days. The calB activity was measured in the cultivation media samples (same as in **Figure 3C**), and are presented in units per liter of culture supernatant (U/L) or units per gram of total protein (U/g). The unit corresponds to the amount of enzyme which liberates 1  $\mu\text{mol}$  pNP per minute with pNPB as a substrate. The samples from the last day of each cultivation subjected to gel-filtration chromatography and freeze-drying were analyzed after reconstitution in water (marked with asterisk). The values and the error bars represent means and standard deviations from three technical replicates.
